# Supplementary material for: Speciation dynamics of metals in dispersion of nanoparticles with discrete distribution of charged binding sites
Source: Royal Society of Chemistry journal article supplement (doi:10.1039/c3cp54659d), 2013-11-25
Supplement: c3cp54659d.pdf [file c3cp54659d.pdf]

## Supporting information

### Speciation dynamics of metals in dispersion of nanoparticles with discrete distribution of charged binding sites.

Pavel D. Polyakov,<sup>1,2</sup> Jérôme F. L. Duval<sup>1,2\*</sup>

<sup>1</sup> Université de Lorraine, Laboratoire Interdisciplinaire des Environnements Continentaux (LIEC), UMR 7360, 15 avenue du Charmois, Vandœuvre-lès-Nancy, F-54501, France.

<sup>2</sup> CNRS, Laboratoire Interdisciplinaire des Environnements Continentaux (LIEC), UMR 7360, 15 avenue du Charmois, Vandœuvre-lès-Nancy, F-54501, France.

\* Corresponding author:

Jérôme F. L. Duval: jerome.duval@univ-lorraine.fr

Tel: 00 33 3 83 59 62 63. Fax: 00 33 3 83 59 62 55.

#### I. Details of the analytical derivation of $k_a^{os}$ for a single metal-binding site (eqn (21), Figure 2).

Equation (17) in the main text may be rewritten in the form

$$k_1^{os} = (2\pi r_p D_M N_a) f_{el}(\bar{a}) \int_{\varphi-\gamma}^{\varphi+\gamma} F(\alpha, \sigma) d\alpha \quad (S1)$$

where we have introduced the function  $F$  defined by

$$F(\alpha, \sigma) = \left[ \bar{s}_{os}^2 + \bar{r}_0 \bar{s}_{os} \cos(\alpha - \varphi) \right] \left[ \bar{r}_0 \cos(\varphi) + \bar{s}_{os} \cos(\alpha) \right] / \bar{r}^3 \quad (S2)$$

and we developed eqn (17) using the relationships  $\cos(\beta) = (\bar{r}^2 + \bar{s}_{os}^2 - \bar{r}_0^2) / (2\bar{r} \times \bar{s}_{os})$  and

$\bar{r} = (\bar{r}_0^2 + \bar{s}_{os}^2 + 2\bar{r}_0 \bar{s}_{os} \cos(\alpha - \varphi))^{1/2}$  that are obtained upon inspection of Figure 2.  $F(\alpha, \sigma)$  can be

Taylor-expanded in terms of  $\sigma = \bar{s}_{os} / \bar{r}_0$  for  $\sigma \ll 1$ . Under such condition, the quantity  $1/\bar{r}^3$  in eqn (S2) is

$$\left[ \bar{r}_0^2 + \bar{s}_{os}^2 + 2\bar{r}_0 \bar{s}_{os} \cos(\alpha - \varphi) \right]^{-3/2} \approx \frac{1}{\bar{r}_0^3} \left\{ 1 - 3\sigma \cos(\alpha - \varphi) + \frac{\sigma^2}{2} (15 \cos^2(\alpha - \varphi) - 3) \right\}. \quad (S3)$$

After combining eqns (S2) and (S3) and retaining the only terms of order  $\sigma, \sigma^2, \sigma^3$ , eqn (S2) reads as

$$F(\alpha, \sigma) \approx \sigma f_1(\alpha) + \sigma^2 f_2(\alpha) + \sigma^3 f_3(\alpha) \quad (\text{S4})$$

where

$$f_1(\alpha) = \cos(\varphi) \cos(\alpha - \varphi) \quad (\text{S5})$$

$$f_2(\alpha) = \cos(\varphi) [1 - 3 \cos^2(\alpha - \varphi)] + \cos(\alpha - \varphi) \cos(\alpha) \quad (\text{S6})$$

$$f_3(\alpha) = -3 \cos(\varphi) \cos(\alpha - \varphi) + \cos(\varphi) \cos(\alpha - \varphi) \left[ (15/2) \cos^2(\alpha - \varphi) - (3/2) \right] + \dots \\ + \cos(\alpha) - 3 \cos^2(\alpha - \varphi) \cos(\alpha) \quad (\text{S7})$$

After evaluation of the integral in eqn (S1) with  $F(\alpha, \sigma)$  given by eqns (S4)-(S7), we obtain

$$k_1^{\text{os}} = k_{\text{a,p}}(a/r_p) \cos(\varphi) \left\{ \sigma \sin(\gamma) + \sigma^2 \left(-\frac{1}{2}\right) \sin(2\gamma) + \sigma^3 \left(\frac{3}{8} \sin(3\gamma) - \frac{1}{8} \sin(\gamma)\right) \right\} \quad (\text{S8})$$

From Figure 2, it is straightforward to show that

$$\gamma = \pi/2 + d\varphi/2 = \pi/2 + \arcsin(\sigma). \quad (\text{S9})$$

With help of trivial trigonometry, we further have for  $\sigma \ll 1$

$$\sin(\gamma) = \cos(\arcsin(\sigma)) = \sqrt{1 - \sigma^2} \approx 1 - \sigma^2/2 \quad (\text{S10})$$

$$\sin(2\gamma) = -\sin(2\arcsin(\sigma)) = -2\sigma\sqrt{1 - \sigma^2} \approx \sigma^3 - 2\sigma \quad (\text{S11})$$

$$\sin(3\gamma) = -\cos(3\arcsin(\sigma)) = -\sqrt{1 - \sigma^2} (1 - 4\sigma^2) \approx \frac{9\sigma^2}{2} - 1 \quad (\text{S12})$$

Combining eqns (S10)-(S12) and eqn (S8), we finally obtain

$$k_1^{\text{os}} = k_{\text{a,p}}(\bar{a}) \cos(\varphi) \left\{ \sigma + O(\sigma^4) \right\}, \quad (\text{S13})$$

which is eqn (18) given in the main text. A successful comparison between results obtained from eqn (S13) and those derived numerically following the approach detailed in the main text, is given in Figure S1.

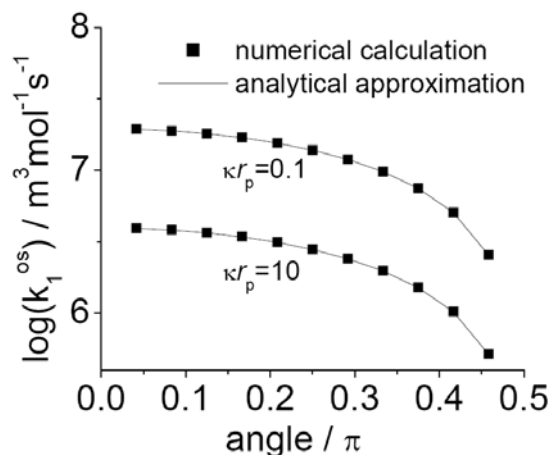

**Figure S1.** Dependence of  $k_a^{\text{os}}$  on the polar angle  $\varphi$  in the hard particle limit ( $a = 0.95r_p$ ) for two values of electrolyte concentrations ( $\kappa r_p = 10, \kappa r_p = 0.1$  with  $r_p = 20$  nm) and a single charged metal-binding site located at  $(\bar{r}_0 = r_p - s_{\text{os}}, \varphi)$  (see nomenclature in Figure 2),  $D = 10^{-9} \text{ m}^2 \text{ s}^{-1}$ . Numerical calculation corresponds to evaluation from eqn (3) and analytical results pertain to prediction from eqn (18), with the electrostatic potential derived from eqns (20),(21) (smeared-out electrostatics) in both cases. The total charge of the soft shell layer is  $Q = 100e$ . Under the conditions of Figure S1, the parameter  $\sigma = 2.5 \times 10^{-3}$  involved in eqn (18) is  $\ll 1$ , which justifies the Taylor decomposition of  $k_a^{\text{os}}$  with respect to  $\sigma$ .

## II. Derivation of the potential distribution for point-like charges in a porous particle under Debye-Hückel condition.

We adopt the spherical coordinate system  $(|\mathbf{r}|, \theta, \varphi)$  with the origin at the center of a porous particle. The local charge density of the point-like charges distributed throughout the particle may be written in terms of Dirac delta functions according to

$$\rho_{\text{fix}}^{\text{ds}}(\mathbf{r}) = e \sum_{i=1}^{N_s} \delta(\mathbf{r} - \mathbf{r}_i) \quad (\text{S14})$$

where  $\mathbf{r}_i$  is the position of the charge  $i$  and the delta function is further defined as

$$\delta(\mathbf{r} - \mathbf{r}_i) = \frac{1}{V_p} \frac{1}{|\bar{\mathbf{r}}|^2} \delta(|\bar{\mathbf{r}}| - |\bar{\mathbf{r}}_i|) \delta(\cos(\theta) - \cos(\theta_i)) \delta(\varphi - \varphi_i) \quad (\text{S15})$$

with  $V_p$  the particle volume. Within the framework of the Debye Hückel approximation, eqn (20) in the main text reads in spherical coordinates

$$\Delta y(|\bar{\mathbf{r}}|, \theta, \varphi) - (\kappa r_p)^2 y(|\bar{\mathbf{r}}|, \theta, \varphi) = -(\kappa r_p)^2 \bar{\rho}_{\text{fix}}(|\bar{\mathbf{r}}|, \theta, \varphi) \quad \text{with} \quad (\text{S16})$$

$$\bar{\rho}_{\text{fix}}(|\bar{\mathbf{r}}|, \theta, \varphi) = \frac{e}{2zFc^*V_p} \sum_{i=1}^{N_s} \frac{1}{|\bar{\mathbf{r}}|^2} \delta(|\bar{\mathbf{r}}| - |\bar{\mathbf{r}}_i|) \delta(\cos(\theta) - \cos(\theta_i)) \delta(\varphi - \varphi_i) \quad (\text{S17})$$

The solution of eqn (S16) is expressed by the well-known Green function for the Helmholtz equation, *i.e.*

$$y(|\bar{\mathbf{r}}|, \theta, \varphi) = \frac{e}{2zFc^*V_p} \sum_{i=1}^{N_s} \frac{\exp\{-\kappa r_p |\bar{\mathbf{r}} - \bar{\mathbf{r}}_i|\}}{4\pi |\bar{\mathbf{r}} - \bar{\mathbf{r}}_i|} \quad (\text{S18})$$

In order to test the validity of our numerical scheme, we considered the situation where seven point-like charges  $e$  were randomly distributed from the center of a soft particle to its outer surface along the radial direction. In order to avoid numerical instabilities, the electrostatic potential distributions were evaluated up to small sphere of radius  $\sigma \rightarrow 0$  that enclosed each point-like charge within the particle. Figure S2 shows a perfect agreement between the analytical results obtained from eqn (S18) and the results obtained from our

numerical solution of linearized Poisson-Boltzmann equation in the extremes of thin and thick electric double layers as compared to particle radius ( $\kappa r_p = 10, \kappa r_p = 0.1$  with  $r_p = 20\text{nm}$ ) (eqns (20),(22)).

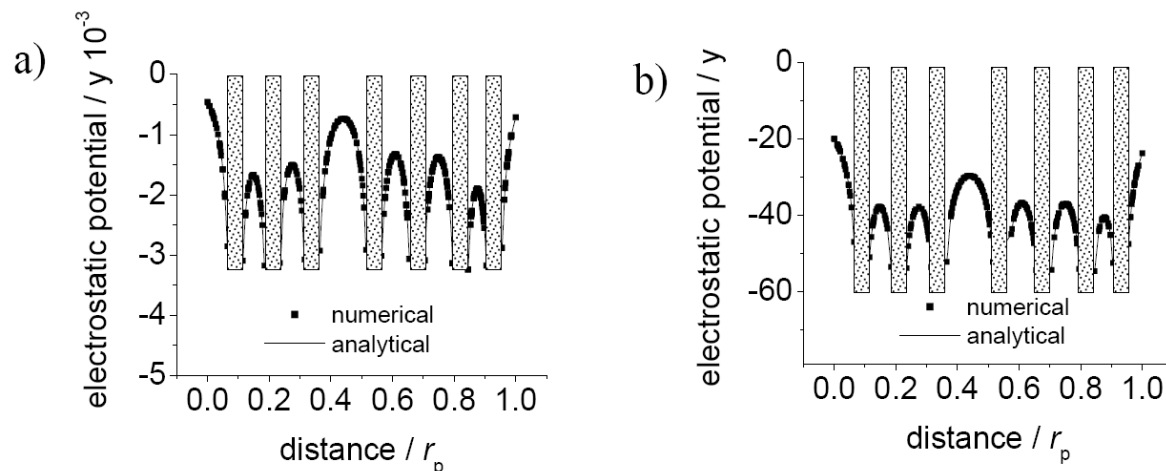

**Figure S2.** Electrostatic potential profiles as the function of the radial distance from the porous particle centre for seven randomly distributed point-like charges  $e$  located at the center of the ligands. Comparison between numerical results (eqns (20),(22) with  $s_{os} \rightarrow 0$ ) and the analytical expression given by eqn (S18). (a)  $\kappa r_p = 10$ , (b)  $\kappa r_p = 0.1$ .  $r_p = 20\text{nm}$ . Vertical bars indicate the positions of the ligands.

### III. Examples of statistical distribution of site-to-site distances in the soft particle limit for uniform and non-uniform site distributions.

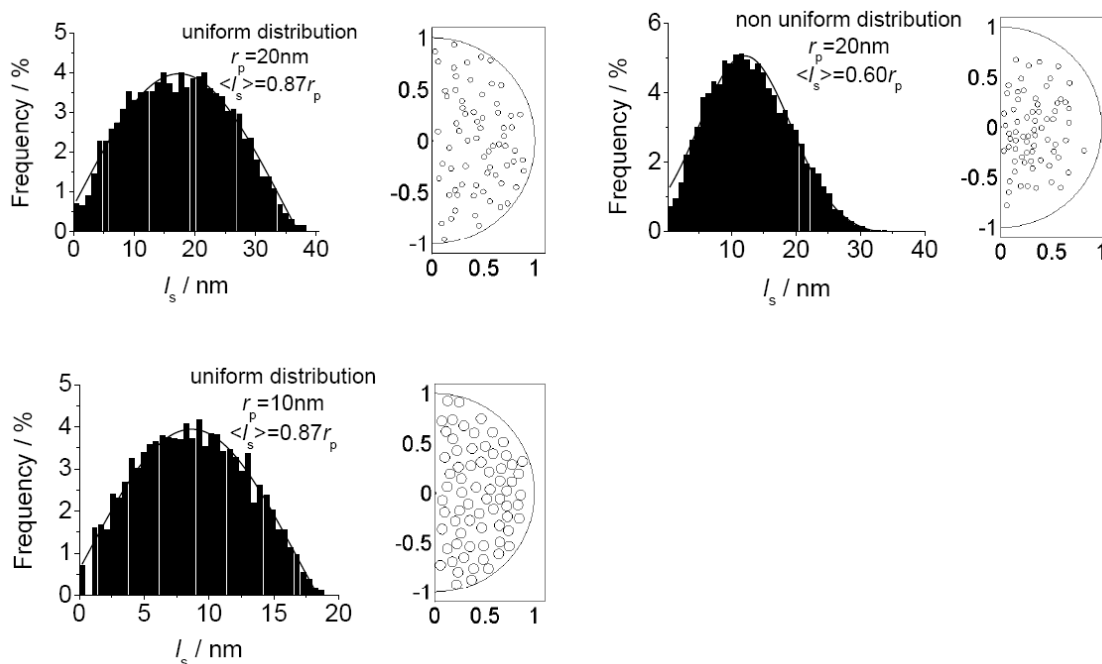

**Figure S3.** Statistical distribution of the site-to-site distance in the soft particle limit  $a = 0.01r_p$  ( $N_s = 70$ ). (a) Uniform distribution,  $r_p = 20\text{nm}$ , (b) Non-uniform distribution,  $r_p = 20\text{nm}$ , (c) uniform distribution,  $r_p = 10\text{nm}$ . Uniform and non-uniform site distributions correspond here to the density probability functions  $\Phi(\bar{x}, \bar{z}) = 1/\pi$  and  $\Phi(\bar{x}, \bar{z}) = 6\left(1 - \sqrt{\bar{x}^2 + \bar{z}^2}\right)^2 / \pi$ , respectively. For each case, we give the corresponding spatial distribution of ligands within the porous particle.
